# Supplementary material for: Soft Selective Sweep on Chemosensory Genes Correlates with Ancestral Preference for Toxic Noni in a Specialist Drosophila Population
Source: PubMed Central journal article supplement (PMC7824377; doi:10.3390/genes12010032), 2020-12-29
Supplement: genes-12-00032-s001.pdf [file genes-12-00032-s001.pdf]

```

#!/usr/bin/perl -w
#Pipeline of the population genomics analysis of chemosensory genes in Drosophila yakuba
mayottensis. Each module (starting with ##) was run separately.
#use strict;
use List::Util qw(sum);

$cmd = "";
#Memory (in gigabytes) allocated to Picard
$mem = 8;

##Indexing the reference genome
#Path of reference genome fasta without .fasta
$reference = "";
#Path to minimap
$minimap = "";
#Path to samtools
$samtools = "";
#Path to all Picard java modules, which should all be in a single folder
$picard = "";

$cmd = $minimap."minimap2 -d " . $reference . ".mmi " . $reference . ".fasta";
system($cmd);
$cmd = "java -Xmx" . $mem . "g -jar " . $picard . " CreateSequenceDictionary REFERENCE=" .
$reference . ".fasta OUTPUT=" . $reference . ".dict";
system($cmd);
$cmd = "samtools faidx " . $reference . ".fasta";
system($cmd);

##Aligning Fastq reads to the reference genome
$i = 0;
#Path to the folder containing the *.fastq files
$genomes = "";
#List of the *.fastq files to be aligned. Remove the extension .fastq
@FastqFile = ();

for ($i = 0; $i < @FastqFile; $i++){
#Uncompress fastq files
    $cmd = 'gunzip ' . $genomes.$FastqFile[$i] . '_1.fastq';
    system($cmd);
    $cmd = 'gunzip ' . $genomes.$FastqFile[$i] . '_2.fastq';
    system($cmd);
#Create sam file

```

```

    $cmd = $minimap."minimap2 -ax sr -t 16 " . $reference . ".fasta " . $genomes.$FastqFile[$i] .
"_1.fastq " . $genomes.$FastqFile[$i] . "_2.fastq -o " . $genomes.$FastqFile[$i] . ".sam";
    system($cmd);
#Create bam file
    $cmd = $samtools . "samtools view -bS " . $genomes.$FastqFile[$i] . ".sam > " .
$genomes.$FastqFile[$i] . ".bam";
    system($cmd);
#Remove sam file
    $cmd = "rm " . $genomes.$FastqFile[$i] . ".sam";
    system($cmd);
#Compress fastq files
    $cmd = 'gzip ' . $genomes.$FastqFile[$i] . '_1.fastq';
    system($cmd);
    $cmd = 'gzip ' . $genomes.$FastqFile[$i] . '_2.fastq';
    system($cmd);
#Clean bam file, i.e. soft-clipping beyond-end-of-reference alignments and setting MAPQ to 0 for
unmapped reads
    $cmd = "java -Xmx" . $mem . " -g -jar " . $picard . "CleanSam INPUT=" . $genomes.$FastqFile[$i] .
".bam OUTPUT=" . $genomes.$FastqFile[$i] . "clean.bam";
    system($cmd);
#Remove bam file
    $cmd = "rm " . $genomes.$FastqFile[$i] . ".bam";
    system($cmd);
#Sort cleaned bam file by the reference sequence name (RNAME) field using the reference sequence
dictionary (@SQ tag). Alignments within these subgroups are secondarily sorted using the left-most
mapping position of the read (POS).
    $cmd = "java -Xmx" . $mem . " -g -jar " . $picard . "SortSam SORT_ORDER=coordinate INPUT=" .
$genomes.$FastqFile[$i] . "clean.bam OUTPUT=" . $genomes.$FastqFile[$i] . "sort.bam";
    system($cmd);
#Remove cleaned bam file
    $cmd = "rm " . $genomes.$FastqFile[$i] . "clean.bam";
    system($cmd);
}

##Generating a synchronized file from sorted bam files
#use strict;

$i = 0;
#Abbreviation of the reference genome to be added at the beginning of the sync file name
$ref = "";
#Abbreviation of the population name if the multiple sorted bam files are from the same population
$pop= "";
#Path to PoPoolation2

```

```

$popoolation = ";
#Create the mpileup command
$cmd = "samtools mpileup -f " . $reference . ".fasta -B ";
push @cmd, $cmd;
for ($i = 0; $i < @FastqFile; $i++){
    push @cmd, $genomes.$FastqFile[$i] . " ";
}
push @cmd, ">";
#Create the mpileup/sync output filename to be used in the mpileup and synchronizing commands
push @mp, $genomes;
push @mp, $ref."_";
push @mp, $pop.".mpileup";
$mp=join(",@mp);
push @cmd, $mp;
$cmd=join(",@cmd);
system($cmd);

#Create the synchronizing command
@cmd=();
@mp=();
$cmd = "java -ea -Xmx7g -jar " . $popoolation . ".mpileup2sync.jar --input ";
push @cmd, $cmd;
push @cmd, $mp;
$cmd = " --output ";
push @cmd, $cmd;
@mp=split('\.', $mp);
push @cmd, $mp[0];
$cmd=".sync --fastq-type sanger --min-qual 20 --threads 8";
push @cmd,$cmd;
$cmd=join(",@cmd);
system($cmd);

##Convert read counts values in a sync file containing inbred lines into genotypes, for example
1145:1235:0:0:0:0 will become 1:1:0:0:0:0 for a heterozygous line and 21:0:0:0:0:0 will become 2:0:0:0:0:0
in a homozygous line for NY and CY (separately)
#Scaffolds to be retained, usually X, 2L, 2R, 3L and 3R
@Chr = ('X','2L','2R','3L','3R');#yakuba
#Scaffolds length according to the reference fasta or gff files (Note for simulans the length of the
scaffolds in gff is +1 that of the reference fasta)
#@Chrsize=(21770863,22324452,21139217,24197627,28832112); #yakuba
#Cumulative value for each position according to the scaffolds order to be used in subsequent sort
and join commands
@Chrcum=(0,21770863,44095315,65234532,89432159);#yakuba

```

```

#Define output sync file
my $outfile = ">".$genomes.$sync."_genotype.sync";
open(O,$outfile);
#Define output sync file for triallelic sites
my $outfile1 = ">".$genomes.$sync."_genotype_t.sync";
open(O1,$outfile1);
#Enter input sync file
my $File = $genomes.$sync.'.sync';
open(M, $File);
#Define the minimum depth at a site
$min=10;
#Define the minimum ratio of an allele
$mina=0.25;
#Parse the input file
while (<M>){
#Remove new line characters from the end of each line in the sync file
    chomp;
#Divide each line of the sync file into multiple elements (columns)
    @line=split('\t',$_);
    for($c=0;$c<@Chr;$c++){
#Retain the desired scaffolds defined in @Chr
        if($line[0] eq $Chr[$c]){
            @pos=();
#Push in the printable array (@pos) the cumulative value for the position
            $loc=$line[1]+$Chrcum[$c];
            push @pos, $loc;
#Then push the three first columns of the sync file, i.e. the scaffold, the position and the nucleotide at
the reference genome
            for($l=0;$l<3;$l++){
                push @pos, $line[$l];
            }
#For each strain/population, note the first strain read counts is $line[3] and the last strain is
$line[@line-1]
            for($p=3;$p<@line;$p++){
#Define the strain/population as an array @pop
                @pop=split(':', $line[$p]);
#Only retain the first four elements in @Nuc, i.e. A, T, C and G
                @strain=@pop[0..3];
#Do not genotype low-depth positions
                if(sum(@strain)<$min){
                    push @pos, "0:0:0:$pop[4]:$pop[5]";
                }
#Genotype high-depth positions, alleles with read counts >= $mina

```

```

else{
    $t=0;
    @genotype=();
    @homo=();
    $genotype="";
    for($b=0;$b<@strain;$b++){
        if((@strain[$b]/sum(@strain))>=$mina){
            push @genotype, 1;
        }
        else{
            push @genotype, 0;
        }
    }
}

#Homozygous sites
if (sum(@genotype) == 1){
    @homo=(2*$genotype[0],2*$genotype[1],2*$genotype[2],2*$genotype[3]);
    push @homo, "$pop[4]:$pop[5]";
    $homo=join(':',@homo);
    push @pos, $homo;
}

#Heterozygous sites
if (sum(@genotype) == 2){
    push @genotype, "$pop[4]:$pop[5]";
    $genotype=join(':',@genotype);
    push @pos, $genotype;
}

#Tri or quadri-allelic sites are omitted
if (sum(@genotype) >2){
    $t++;
    push @pos, "0:0:0:$pop[4]:$pop[5]";
}

}

if($t > 0){
    print O1 "$_\n";
}

$pos=join("\t",@pos);
print "$pos\n";
print O "$pos\n";
}
}
}

```

```

##For Mayotte flies sequences in two pools each with equal contributions from 11 different isofemale
lines
#Name of the input sync file
$sync=";
#Define the size of the pools (i.e. chromosome numbers = 2N of pooled lines in diploids). In our case
22, since each pool consisted of females from 11 isofemale lines
@Pool=(22,22);
#Define output sync file
my $outfile = ">".$genomes.$sync."_genotype.sync";
open(O,$outfile);
#Define output sync file for triallelic sites
my $outfile1 = ">".$genomes.$sync."_genotype_t.sync";
open(O1,$outfile1);
#Enter input sync file
my $File = $genomes.$sync.'.sync';
open(M, $File);
#Define the minimum depth at a site
$min=10;
#Define the minimum ratio of an allele
$mina=0.25;
#Parse the input file
while (<M>){
#Remove new line characters from the end of each line in the sync file
    chomp;
#Divide each line of the sync file into multiple elements (columns)
# @line=split("\t",$_);
    @line=split('\t',$_);
    for($c=0;$c<@Chr;$c++){
#Retain the desired scaffolds defined in @Chr
        if($line[0] eq $Chr[$c]){
            @pos=();
#Push in the printable array (@pos) the cumulative value for the position
            $loc=$line[1]+$Chrcum[$c];
            push @pos, $loc;
#Then push the three first columns of the sync file, i.e. the scaffold, the position and the nucleotide at
the reference genome
            for($l=0;$l<3;$l++){
                push @pos, $line[$l];
            }
#For each strain/population, note the first strain read counts is $line[3] and the last strain is
$line[@line-1]
            for($p=3;$p<@line;$p++){
#Define the strain/population as an array @pop

```

```

    @pop=split(':', $line[$p]);
#Only retain the first four elements in @Nuc, i.e. A, T, C and G
    @strain=@pop[0..3];
#Do not genotype low-depth positions
    if(sum(@strain)<$min){
        push @pos, "0:0:0:0:$pop[4]:$pop[5]";
    }
#Genotype high-depth positions, alleles with read counts >= 1/2N
    else{
        $t=0;
        @genotype=();
        $genotype="";
        for($b=0;$b<@strain;$b++){
            if(($strain[$b]/sum(@strain))>=(1/$Pool[$p-3])){
                if(((($strain[$b]/sum(@strain))*($Pool[$p-3]))-0.5
int(($strain[$b]/sum(@strain))*($Pool[$p-3]))){
                    push @genotype, int(($strain[$b]/sum(@strain))*($Pool[$p-3])) + 1;
                }
            }
            else{
                push @genotype, int(($strain[$b]/sum(@strain))*($Pool[$p-3]));
            }
        }
        else{
            push @genotype, 0;
        }
    }
    push @genotype, "$pop[4]:$pop[5]";
    $genotype=join(':', @genotype);
    push @pos, $genotype;
}
}
}

```

```

##Merging multiple lines in a sync file into one
#Names of the input sync files
@sync=();
for($s=0;$s<@sync;$s++){
    my $outfile = ">".$genomes.$sync[$s]."_sum.sync";
}

```

```

open(O,$outfile);
my $File = $genomes[$s].$sync[$s].'_genotype.sync';
open(M, $File);
while (<M>){
    chomp;
    $A = 0;
    $T = 0;
    $C = 0;
    $G = 0;
    $N = 0;
    $gap = 0;
    @AoA=();
    @line=split("\t",$_);
    for($l=0;$l<4;$l++){
        print "$line[$l]\t";
        print O "$line[$l]\t";
    }
    $POP = @line - 4;
    for($p=4;$p<@line;$p++){
        @pop=split(":",$line[$p]);
        push @AoA, [@pop];
    }
    for($j=0;$j<$POP;$j++){
        $A = $AoA[$j][0]+$A;
        $T = $AoA[$j][1]+$T;
        $C = $AoA[$j][2]+$C;
        $G = $AoA[$j][3]+$G;
        $N = $AoA[$j][4]+$N;
        $gap = $AoA[$j][5]+$gap;
    }
    print "$A:$T:$C:$G:$N:$gap\n";
    print O "$A:$T:$C:$G:$N:$gap\n";
}
}

```

##Joining multiple \*.sync files

#Paths to the folders containing the input \*.sync files if all files are not in the same folder

#@genomes=();

#Names of the input sync files

@sync=();

#sort \*.sync files according to the first column, i.e. the cumulative position value

for(\$s=0;\$s<@sync;\$s++){

```

    $cmd='sort -n '.$genomes.$sync[$s].'.sync >'.$genomes.$sync[$s].'_sort.sync';

```



```

    print "$cmd\n";
    system($cmd);
}

#join sorted *.sync files according to the first column. Keep the first four columns from the first file
and then add the fifth column progressively from each file
$File1=$sync[0].'_sort';
#$j=1;
for($s=1;$s<@sync;$s++){
    @cmd=();
    @out=();
    push @cmd, 'join -j 1 -o 1.1,1.2,1.3,1.4';
    for($i=5;$i<=4+$s;$i++){
        push @cmd, '1.'.$i;
    }
    push @cmd, ',2.5 '.$genomes.$File1.'.sync '.$genomes.$sync[$s].'_sort.sync >'.$genomes;
    push @out, $ref;
    for($p=0;$p<=$s;$p++){
        @pop=split('_', $sync[$p]);
        push @out, '_'.$pop[1];
    }
    push @out, '_sort';
    $out=join(",@out);
    push @cmd, $out;
    push @cmd, '.sync';
    $cmd=join(",@cmd);
    print "$cmd\n";
    system($cmd);
    $File1=$out;
}

##Estimating pi from sync files
#Name of the *_sort.sync file without the extension .sync
$sync="";
#Name of the output .pi file
my $outfile = ">".$genomes.$sync.".pi";
open(O,$outfile);
#Name of the input *_sort.sync file
my $infile = $genomes.$sync.".sync";
open(M, $infile);
#Parse the input file
while (<M>){
#Remove new line characters from the end of each line in the input file

```

```

    chomp;
#Divide each line of the sync file into multiple elements (columns) depending on space characters,
e.g., , \t, \r, \n or \f. This is because the join command could substitute \r with
    @line=split('\s',$_);
#The sum of A, T, C, G alleles at a site for a population
    @size=();
#Sum of hereterozygote frequencies for all alleles at a site for each population
    @pi=();
#For each strain/population, note the first strain read counts is $line[4] and the last strain is
$line[@line-1]
    for($p=4;$p<@line;$p++){
#Define the strain/population as an array @pop
        @pop=split(':', $line[$p]);
#Only retain the first four elements, i.e. A, T, C and G
        @strain=@pop[0..3];
#Estimate the population size, i.e. the sum of A, T, C and G
        $size=sum(@strain);
#Hereterozygote frequencies for all alleles at a site for a population
        @H=();
#Skip populations with coverage < 10 at a site
        unless($size < 10){
            for($n=0;$n<@strain;$n++){
#For each allele, estimate the frequency of drawing it (p) times the frequency of drawing an
alternative allele (1 - p)
                $H=($strain[$n]/$size)*(1-($strain[$n]/$size));
                push @H, $H;
            }
#Heterozygosity frequency at a site for a population
            $pi=sum(@H);
            push @pi, $pi;
        }
    }
#Print the output
    if(scalar(@pi) == @line-4){
        print "$line[0] \t $line[1] \t $line[2] \t $line[3]";
        print O "$line[0] \t $line[1] \t $line[2] \t $line[3]";
        for($p=0;$p<@pi;$p++){
            print "\t $pi[$p]";
            print O "\t $pi[$p]";
        }
        print "\n";
        print O "\n";
    }

```

```

}

##Estimate Hudson-Slatkin-Maddison (1992) Fst from sync file for population pairs
#Name of the *_sort.sync file without the extension .sync
$sync="";
#Name of the output .fst file
my $outfile = ">".$genomes.$sync.".fst";
open(O,$outfile);
#Name of the input *_sort.sync file
my $infile = $genomes.$sync.".sync";
open(M, $infile);
#Parse the input file
open(M, $infile);
while (<M>){
    chomp;
    @line=split('\s',$_);
    @size=();
    @A=();
    @T=();
    @C=();
    @G=();
    for($p=4;$p<@line;$p++){
        @pop=split(':', $line[$p]);
        @strain=@pop[0..3];
        $size=sum(@strain);
        push @size, $size;
#Create an array for population counts for each allele at a site
        unless($size < 10){
            push @A, $strain[0];
            push @T, $strain[1];
            push @C, $strain[2];
            push @G, $strain[3];
        }
    }
}
#Skip sites with any population with <10 reads
if(scalar(@A) == @line-4){
#Estimate between-population heterozygosity, if all population are homozygous for the same allele,
$H = 0
    $H = 1 - ((sum(@A)/sum(@size))**2) - ((sum(@T)/sum(@size))**2) - ((sum(@C)/sum(@size))**2) -
    ((sum(@G)/sum(@size))**2);
#Retain only variable sites, i.e. $H>0
    if ($H > 0){
        print "$line[0]\t$line[1]\t$line[2]\t$line[3]";
    }
}

```

```

    print O "$line[0]\t$line[1]\t$line[2]\t$line[3]";
#Compare pairs of populations
#Define allele frequencies in pop1
    for($i=0;$i<@line-4;$i++){
        @p1=($A[$i]/$size[$i],$T[$i]/$size[$i],$C[$i]/$size[$i],$G[$i]/$size[$i]);
        @q1=(1-($A[$i]/$size[$i]),1-($T[$i]/$size[$i]),1-($C[$i]/$size[$i]),1-($G[$i]/$size[$i]));
#Define allele frequencies in pop2
        for($j=$i+1; $j < @line-4; $j++){
            @Hw=();
            @Hb=();
            @p2=($A[$j]/$size[$j],$T[$j]/$size[$j],$C[$j]/$size[$j],$G[$j]/$size[$j]);
            @q2=(1-($A[$j]/$size[$j]),1-($T[$j]/$size[$j]),1-($C[$j]/$size[$j]),1-($G[$j]/$size[$j]));
            for($b=0;$b<@p1;$b++){
#For each allele, estimate average within-population heterozygosity and between-population
heterozygosity in each pair of populations
                push @Hw, ($p1[$b] * $q1[$b]) + ($p2[$b] * $q2[$b]);
                push @Hb, ($p1[$b] * $q2[$b]) + ($p2[$b] * $q1[$b]);
            }
#Estimate average within-population heterozygosity for all alleles
            $Hw=sum(@Hw);
#Estimate between-population heterozygosity for all alleles
            $Hb=sum(@Hb);
#If the two populations are homozygous for the same allele (i.e. $Hb = 0), set $Fst = 0
            if($Hb==0){
                $Fst=0;
            }
#Estimate Fst
            else{
                $Fst=1-($Hw/$Hb);
            }
            print "\t$Fst";
            print O "\t$Fst";
        }
    }
    print "\n";
    print O "\n";
}
}
}
exit;

```
